# Supplementary material for: Cognitive Function, Healthy Lifestyle, and All-Cause Mortality among Chinese Older Adults: A Longitudinal Prospective Study
Source: MDPI journal article supplement (doi:10.3390/nu16091297), 2024-04-26
Supplement: s1 [file s1]

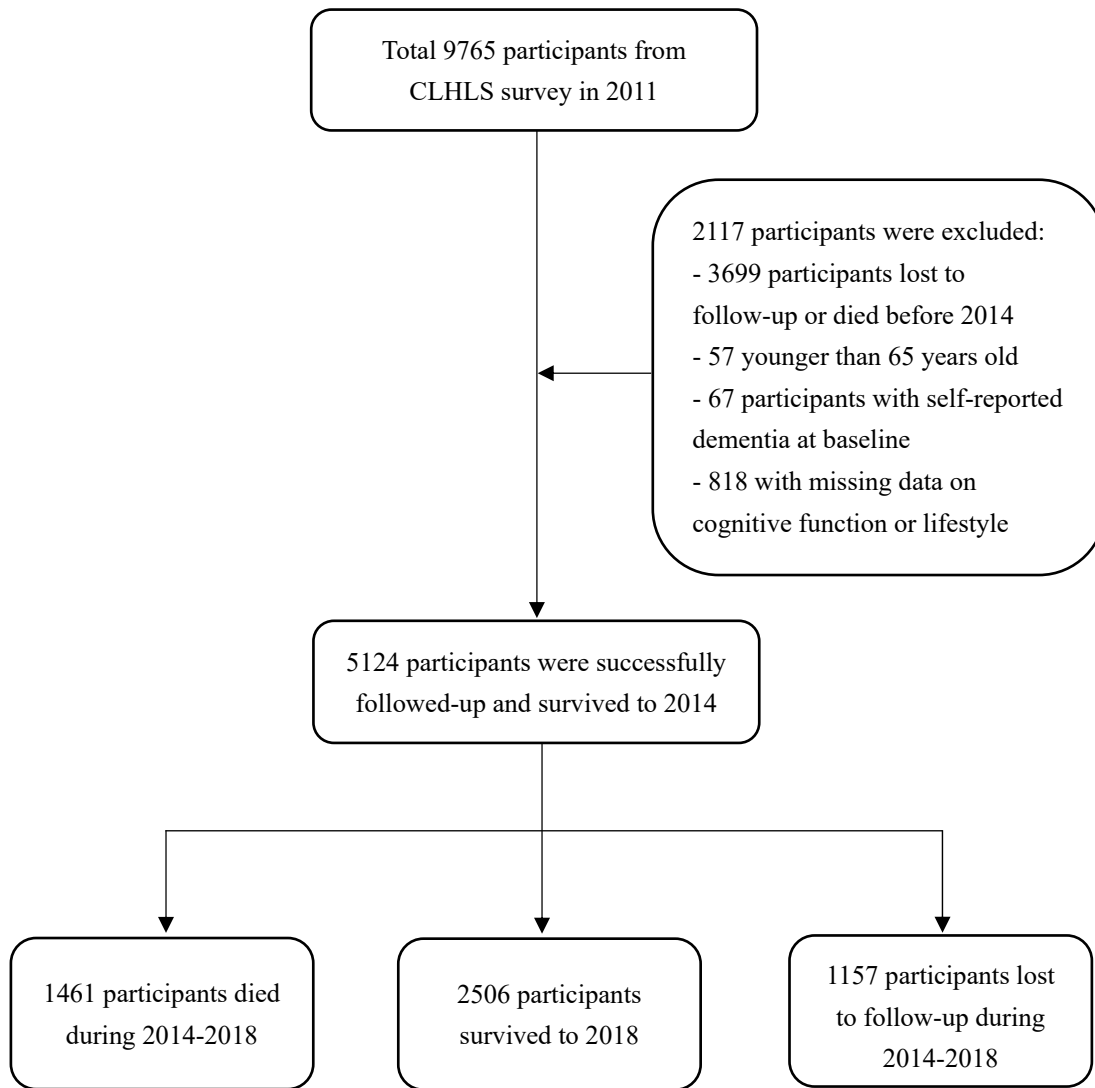

**Figure S1. Flow chart of the included CLHLS participants**

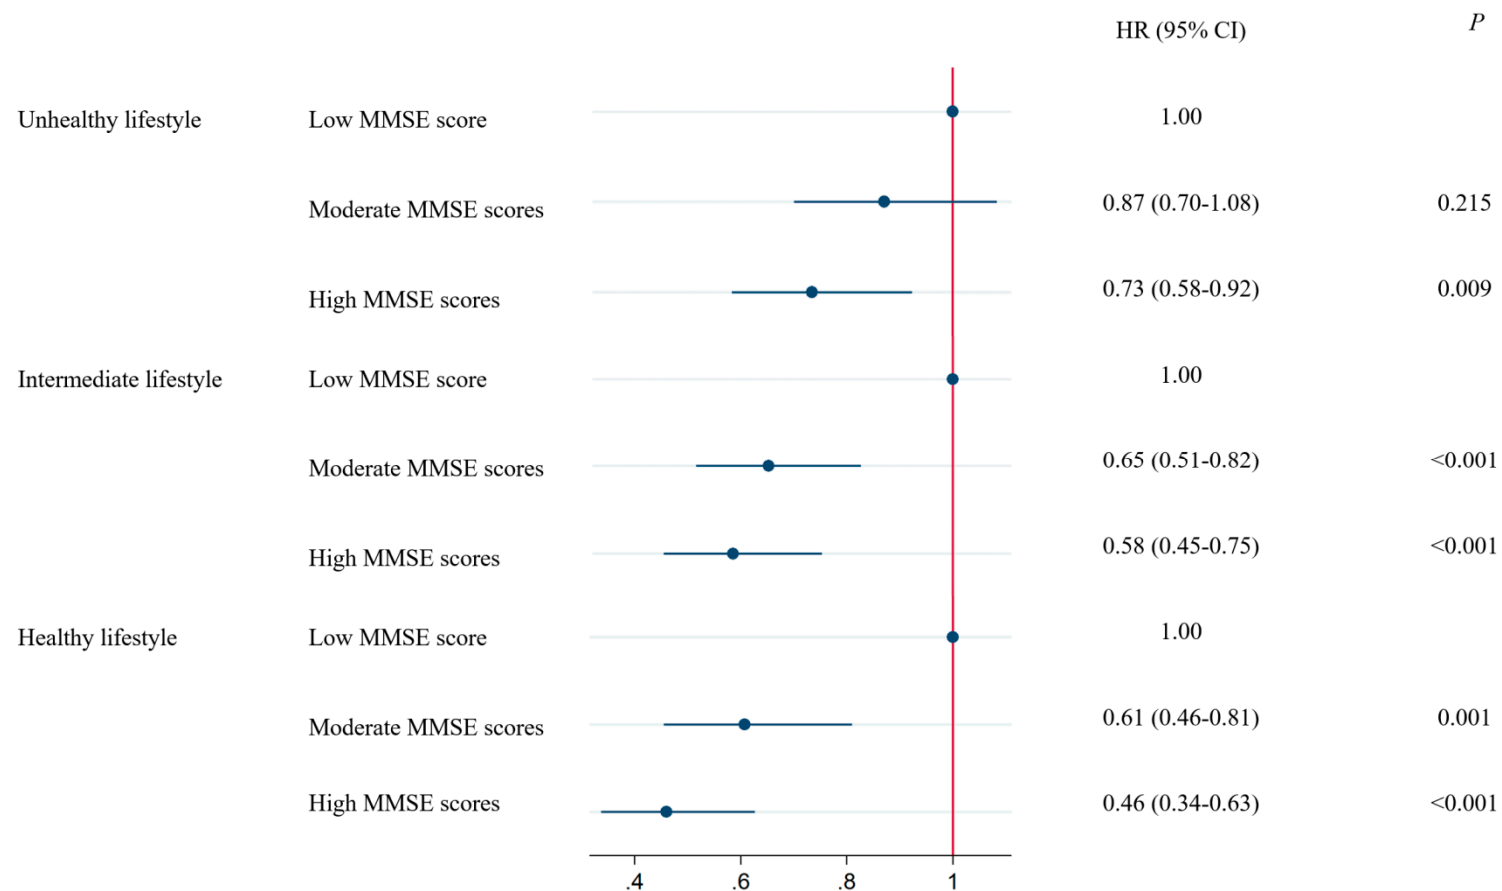

**Figure S2. Associations of the MMSE scores with mortality stratified by lifestyles. Results were adjusted for age, sex, education, residence, marital status, living pattern, self-rated of economic status, ADL in disability and history of chronic disease (diabetes, heart diseases, cancer and stroke). MMSE, Mini-Mental State Examination; HR, hazard ratio; CI, confidence interval.**
